# Supplementary material
Source: PubMed Central journal article supplement (PMC6239933)

A

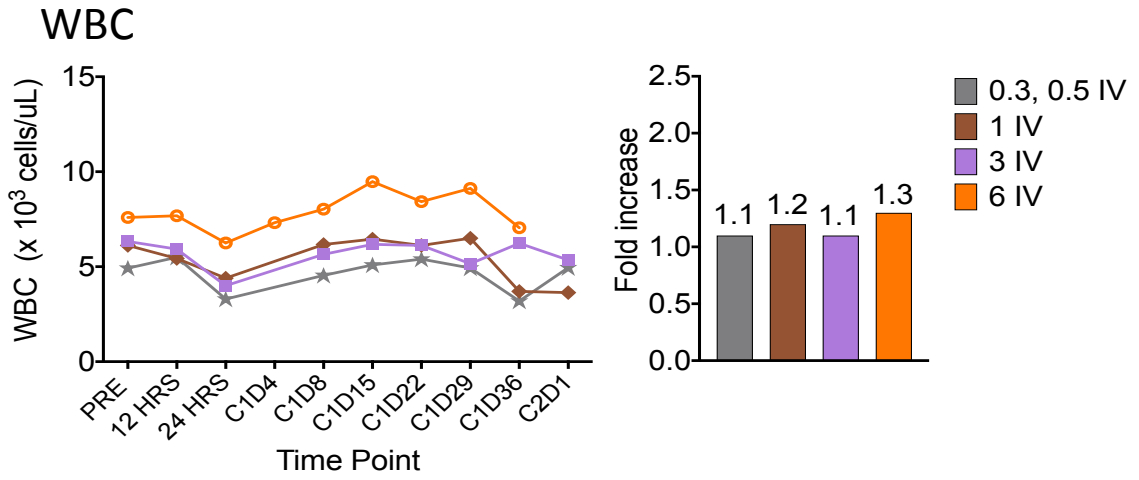

B

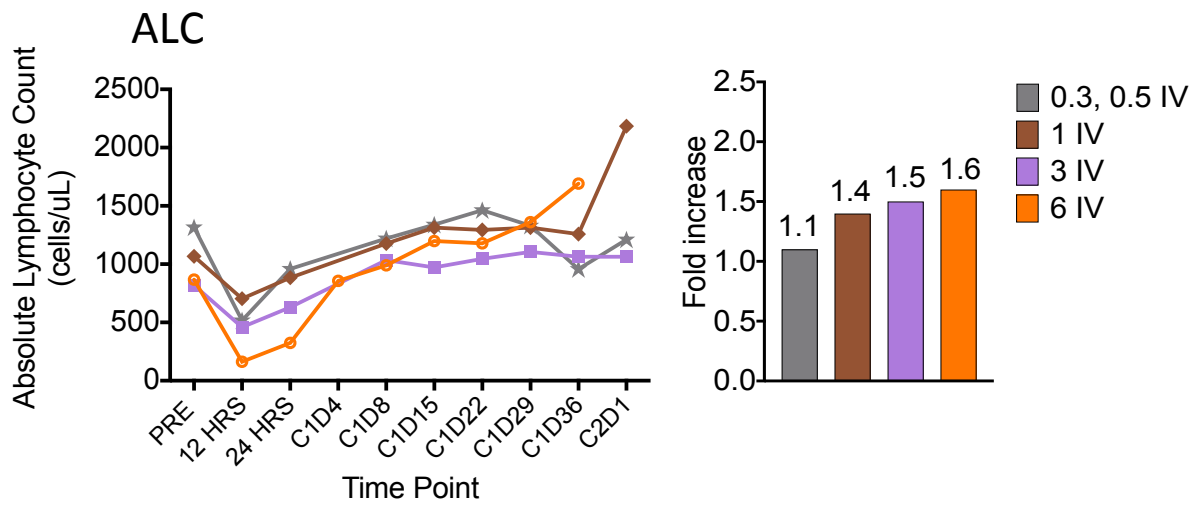

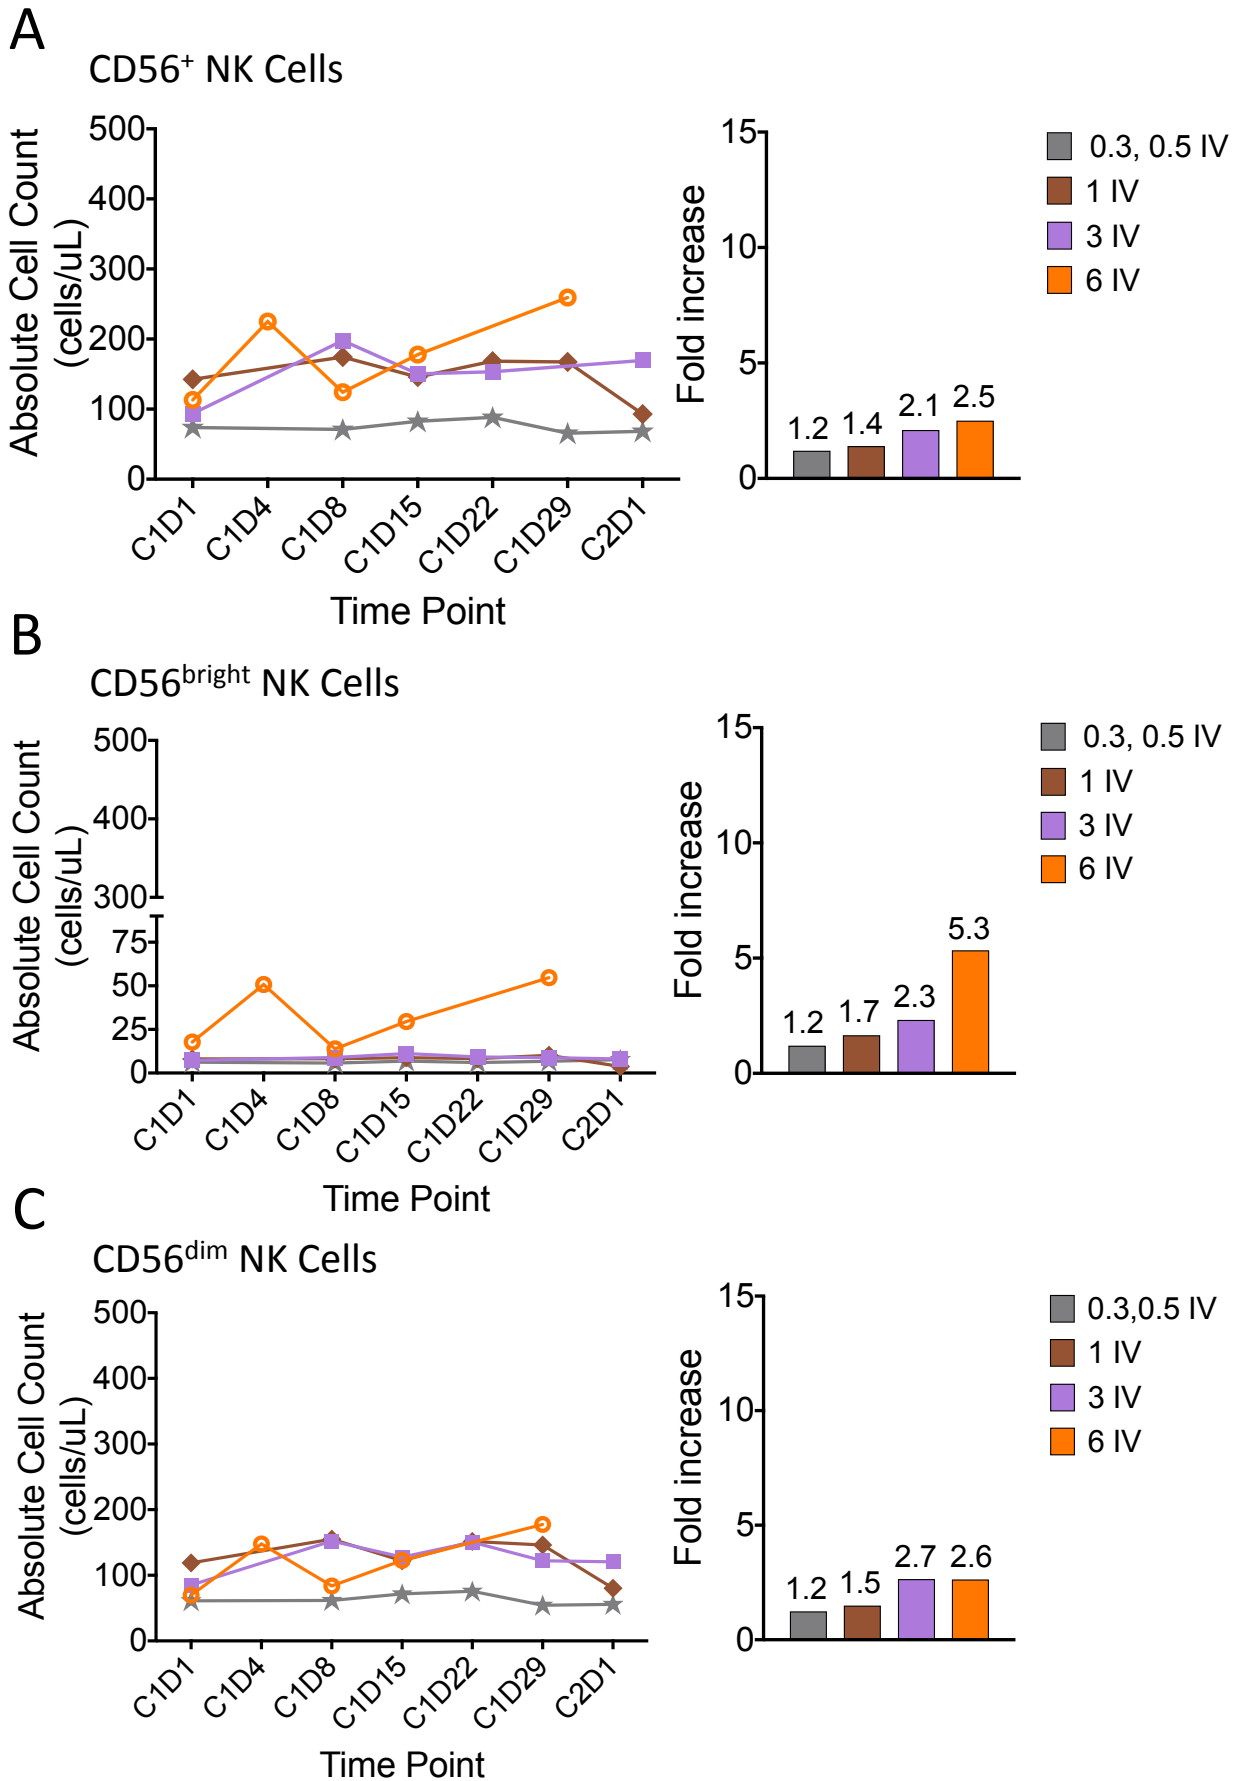

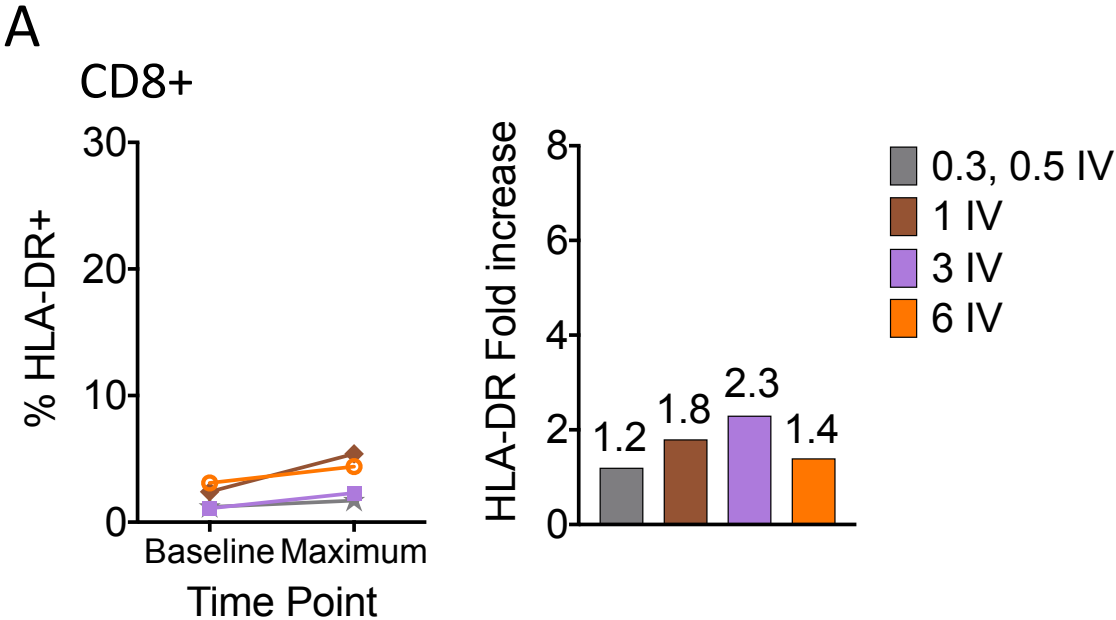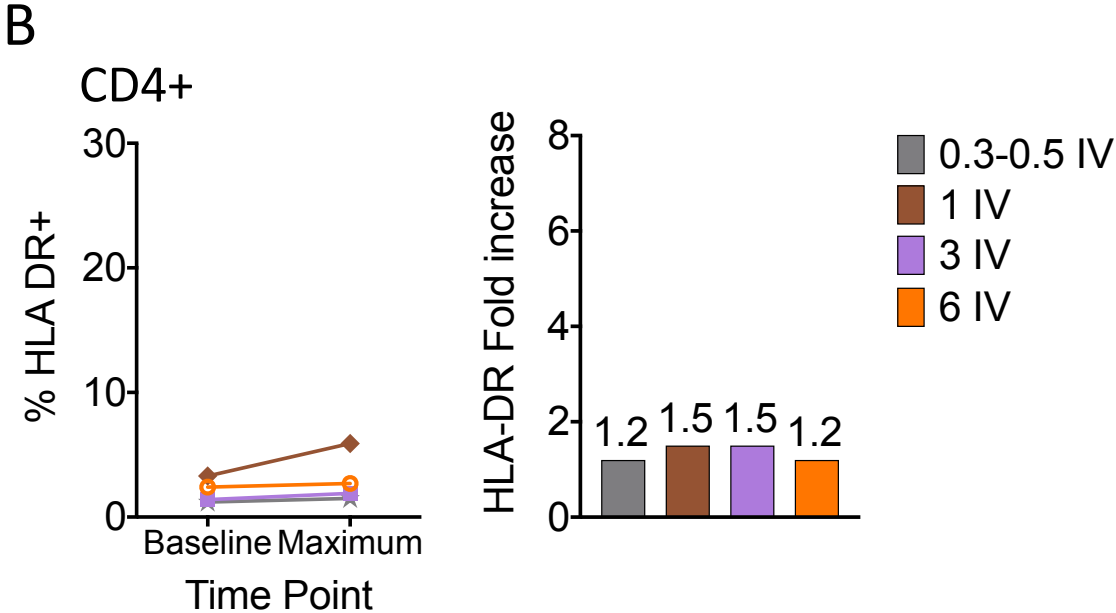

Supplement: NIHMS1500543-supplement-2.pdf [file NIHMS1500543-supplement-2.pdf]
